# Supplementary material
Source: PubMed Central journal article supplement (PMC11028222)
Supplement: 262_2018_2190_MOESM1_ESM.pdf [file 262_2018_2190_MOESM1_ESM.pdf]

Supplementary Figure 1

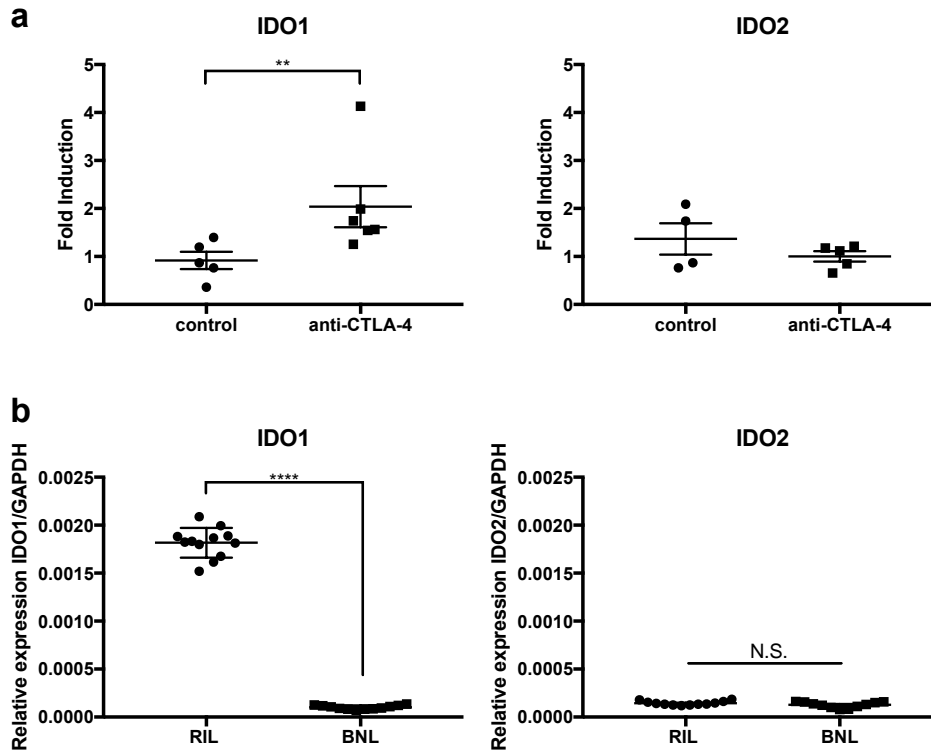

Supplementary Figure 1

**a** Male C57BL/6 mice were injected with  $10^6$  RIL-175 tumor cells in 100 $\mu$ L PBS in left inguinal pocket. 100 $\mu$ g/100 $\mu$ L anti-CTLA-4 antibody was administered on days 8, 11, and 14. Mice were sacrificed on day 15 and RT-qPCR was performed for IDO1 and IDO2 in RIL-175 tumors after anti-CTLA-4 treatment. **b** Relative baseline IDO1 and IDO2 expression compared to GAPDH in RIL-175 and BNL tumor cells.  $10^6$  tumor cells were cultured *in vitro* and baseline IDO1 and IDO2 expression was measured by RT-qPCR.

\*:  $P < 0.05$ , \*\*:  $P < 0.01$ , \*\*\*:  $P < 0.001$ , \*\*\*\*:  $P < 0.0001$

## Supplementary Figure 2

RIL-175

**a**

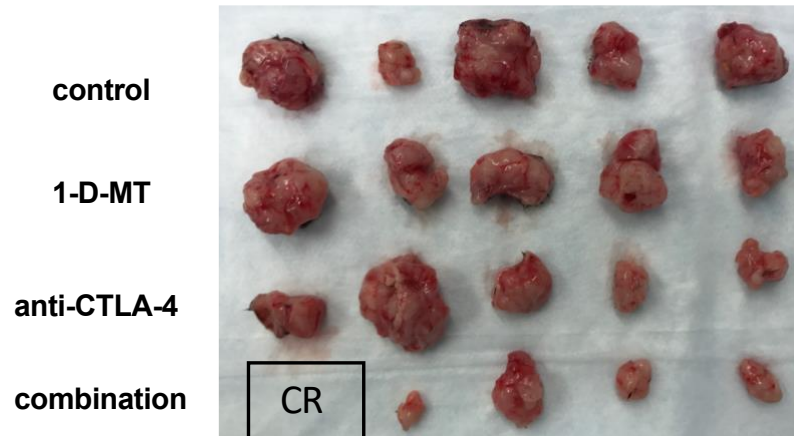

**b**

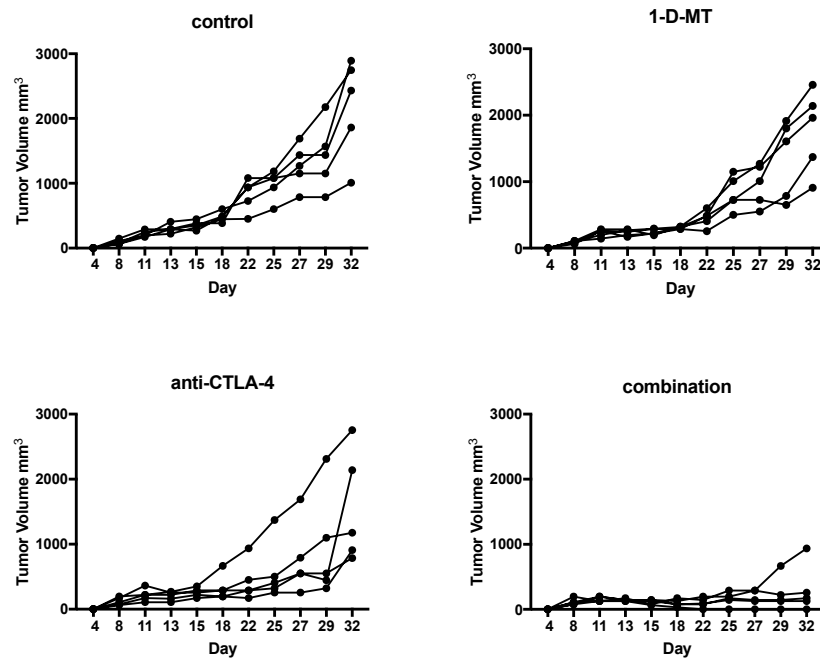

## Supplementary Figure 2

**a** Gross image of subcutaneous RIL-175 tumors. **b** Tumor growth kinetics of individual mice (mm<sup>3</sup>).

**Supplementary Figure 3**

**a**

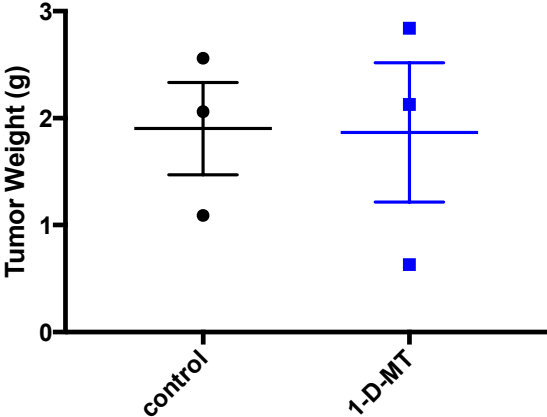

**b**

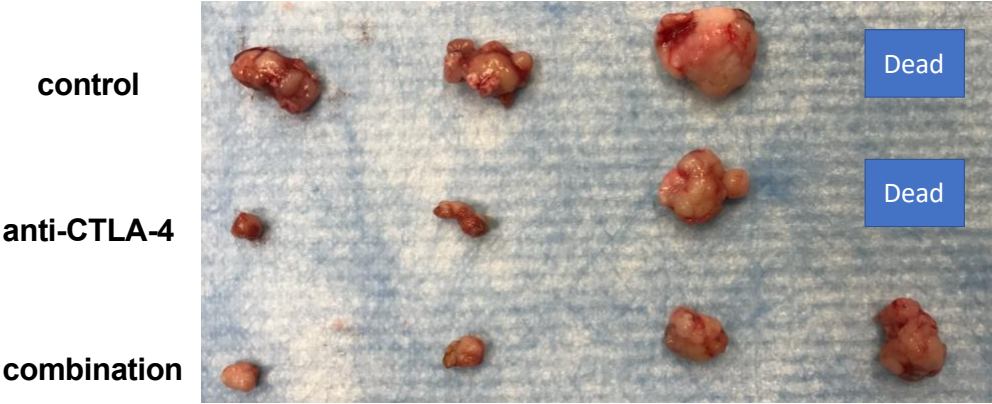

**Supplementary Figure 3**

**a** Orthotopic tumor weight (g) for control mice vs 1-D-MT alone. **b** Gross images of orthotopic RIL-175 tumors with liver dissected away from tumor. One mouse in the control group and anti-CTLA-4 group died as a result of tumor burden before the end of the experiment.

**Supplementary Table 1: Mouse Primers (5' → 3')**

|               |                      |
|---------------|----------------------|
| IDO1 Forward  | CCCAGTCCGTGAGTTTGTC  |
| IDO1 Reverse  | CTCTTCCCCTTGTCGCCAT  |
| IDO2 Forward  | AATGAGGGACTACATGCCGC |
| IDO2 Reverse  | CTGGTGGCAGCGGAGATAAT |
| GAPDH Forward | CCTGCACCACCAACTGCTTA |
| GAPDH Reverse | TCATGAGCCCTTCCACAATG |

**Supplementary Table 2: Human Primers (5' → 3')**

|               |                      |
|---------------|----------------------|
| IDO1 Forward  | ATATGCCACCAGCTCACAGG |
| IDO1 Reverse  | AGCTTTCACACAGGCGTCAT |
| IDO2 Forward  | ATGCCTCCTTCCCATAAGGC |
| IDO2 Reverse  | TGGTGATGTGATAGCTCCGC |
| GAPDH Forward | GAAGGTGAAGGTCGGAGTC  |
| GAPDH Reverse | GAAGATGGTGATGGGATTTC |
